# Supplementary material for: Characterisation of the safety profile of evobrutinib in over 1000 patients from phase II clinical trials in multiple sclerosis, rheumatoid arthritis and systemic lupus erythematosus: an integrated safety analysis
Source: PubMed Central journal article supplement — J Neurol Neurosurg Psychiatry. 2022 Nov 23;94(1):1–9. doi: 10.1136/jnnp-2022-328799 (PMC9763187; doi:10.1136/jnnp-2022-328799), 2022-11-23
Supplement: jnnp-2022-328799supp001.pdf [file jnnp-2022-328799supp001.pdf]

## SUPPLEMENT

eTable 1: Most frequently used concomitant medications

| Patients, n (%)<br>ACT Class Level 2 | MS                |                        | RA                |                        | SLE                |                        |
|--------------------------------------|-------------------|------------------------|-------------------|------------------------|--------------------|------------------------|
|                                      | Placebo<br>(n=54) | Evobrutinib<br>(n=208) | Placebo<br>(n=97) | Evobrutinib<br>(n=293) | Placebo<br>(n=120) | Evobrutinib<br>(n=360) |
| <b>Analgesics</b>                    | 15 (27.8)         | 48 (23.1)              | 18 (18.6)         | 71 (24.2)              | 52 (43.3)          | 165 (45.8)             |
| Paracetamol                          | 3 (5.6)           | 17 (8.2)               | 8 (8.2)           | 35 (11.9)              | 26 (21.7)          | 88 (24.4)              |
| Acetylsalicylic acid                 | 1 (1.9)           | 7 (3.4)                | 2 (2.1)           | 9 (3.1)                | 14 (11.7)          | 32 (8.9)               |
| Tramadol                             | –                 | 1 (0.5)                | 1 (1.0)           | 5 (1.7)                | 5 (4.2)            | 22 (6.1)               |
| Gabapentin                           | 2 (3.7)           | 3 (1.4)                | –                 | 2 (0.7)                | 7 (5.8)            | 13 (3.6)               |
| Duloxetine hydrochloride             | 1 (1.9)           | –                      | –                 | 2 (0.7)                | 6 (5.0)            | 13 (3.6)               |
| Paracetamol; tramadol hydrochloride  | 1 (1.9)           | 2 (1.0)                | 2 (2.1)           | 6 (2.0)                | 2 (1.7)            | 7 (1.9)                |
| Pregabalin                           | 1 (1.9)           | 2 (1.0)                | –                 | 3 (1.0)                | 1 (0.8)            | 12 (3.3)               |
| Amitriptyline                        | –                 | 1 (0.5)                | 1 (1.0)           | 2 (0.7)                | 1 (0.8)            | 10 (2.8)               |
| Metamizole sodium                    | 1 (1.9)           | 5 (2.4)                | 1 (1.0)           | 2 (0.7)                | 1 (0.8)            | 1 (0.3)                |
| <b>Immunosuppressants</b>            | –                 | –                      | 95 (97.9)         | 291 (99.3)             | 108 (90.0)         | 325 (90.3)             |
| Methotrexate                         | –                 | –                      | 87 (89.7)         | 265 (90.4)             | 13 (10.8)          | 47 (13.1)              |
| Hydroxychloroquine                   | –                 | –                      | 2 (2.1)           | 18 (6.1)               | 57 (47.5)          | 186 (51.7)             |
| Azathioprine                         | –                 | –                      | –                 | –                      | 22 (18.3)          | 62 (17.2)              |
| Mycophenolate mofetil                | –                 | –                      | –                 | –                      | 16 (13.3)          | 48 (13.3)              |

|                                     |          |           |           |            |            |            |
|-------------------------------------|----------|-----------|-----------|------------|------------|------------|
| Chloroquine                         | –        | –         | 2 (2.1)   | 2 (0.7)    | 13 (10.8)  | 31 (8.6)   |
| Methotrexate sodium                 | –        | –         | 8 (8.2)   | 25 (8.5)   | 2 (1.7)    | 5 (1.4)    |
| Chloroquine phosphate               | –        | –         | 1 (1.0)   | 3 (1.0)    | 7 (5.8)    | 25 (6.9)   |
| Hydroxychloroquine sulfate          | –        | –         | –         | 1 (0.3)    | 10 (8.3)   | 21 (5.8)   |
| Leflunomide                         | –        | –         | –         | 5 (1.7)    | –          | 5 (1.4)    |
| Mycophenolate sodium                | –        | –         | –         | –          | –          | 3 (0.8)    |
| <b>Corticosteroids</b>              | 8 (14.8) | 33 (15.9) | 63 (64.9) | 177 (60.4) | 105 (87.5) | 316 (87.8) |
| Prednisone                          | 1 (1.9)  | 4 (1.9)   | 16 (16.5) | 67 (22.9)  | 55 (45.8)  | 154 (42.8) |
| Methylprednisolone                  | 6 (11.1) | 18 (8.7)  | 30 (30.9) | 65 (22.2)  | 19 (15.8)  | 74 (20.6)  |
| Prednisolone                        | –        | –         | 9 (9.3)   | 31 (10.6)  | 22 (18.3)  | 60 (16.7)  |
| Meprednisone                        | –        | –         | 6 (6.2)   | 10 (3.4)   | 2 (1.7)    | 12 (3.3)   |
| Deflazacort                         | –        | –         | 1 (1.0)   | 3 (1.0)    | 8 (6.7)    | 13 (3.6)   |
| Methylprednisolone sodium succinate | 1 (1.9)  | 11 (5.3)  | –         | –          | 1 (0.8)    | 1 (0.3)    |
| Hydrocortisone                      | –        | –         | 1 (1.0)   | 2 (0.7)    | 2 (1.7)    | 5 (1.4)    |
| Dexamethasone                       | –        | 1 (0.5)   | 1 (1.0)   | –          | –          | 4 (1.1)    |
| Betamethasone                       | –        | 1 (0.5)   | –         | 2 (0.7)    | –          | 1 (0.3)    |
| Betamethasone dipropionate          | –        | –         | –         | 2 (0.7)    | –          | 2 (0.6)    |

**MS**, multiple sclerosis; **RA**, rheumatoid arthritis; **SLE**, systemic lupus erythematosus.

eTable 2: EAIRs of BTK inhibitor or concomitant drug class-associated TEAEs by preferred term

|                                                   | MS                |      |                        |      | RA                |      |                        |      | SLE                |      |                        |      | Total              |      |                        |      |
|---------------------------------------------------|-------------------|------|------------------------|------|-------------------|------|------------------------|------|--------------------|------|------------------------|------|--------------------|------|------------------------|------|
|                                                   | Placebo<br>(n=54) |      | Evobrutinib<br>(n=208) |      | Placebo<br>(n=97) |      | Evobrutinib<br>(n=293) |      | Placebo<br>(n=120) |      | Evobrutinib<br>(n=360) |      | Placebo<br>(n=271) |      | Evobrutinib<br>(n=861) |      |
|                                                   | n (%)             | EAIR | n (%)                  | EAIR | n (%)             | EAIR | n (%)                  | EAIR | n (%)              | EAIR | n (%)                  | EAIR | n (%)              | EAIR | n (%)                  | EAIR |
| <b>Cardiac disorders</b>                          |                   |      |                        |      |                   |      |                        |      |                    |      |                        |      |                    |      |                        |      |
| Tachycardia                                       | 0 (0.0)           | –    | 0 (0.0)                | –    | 0 (0.0)           | –    | 0 (0.0)                | –    | 0 (0.0)            | –    | 1 (0.3)                | 0.3  | 0 (0.0)            | –    | 1 (0.1)                | 0.2  |
| Ventricular arrhythmia                            | 0 (0.0)           | –    | 0 (0.0)                | –    | 0 (0.0)           | –    | 1 (0.3)                | 1.5  | 0 (0.0)            | –    | 0 (0.0)                | –    | 0 (0.0)            | –    | 1 (0.1)                | 0.2  |
| Coronary artery disease                           | 0 (0.0)           | –    | 0 (0.0)                | –    | 0 (0.0)           | –    | 0 (0.0)                | –    | 0 (0.0)            | –    | 1 (0.3)                | 0.3  | 0 (0.0)            | –    | 1 (0.1)                | 0.2  |
| <b>Hemorrhage-related TEAEs</b>                   |                   |      |                        |      |                   |      |                        |      |                    |      |                        |      |                    |      |                        |      |
| Bleeding†                                         | 0 (0.0)           | –    | 1 (0.5)                | 2.3  | 1 (1.0)           | 4.8  | 4 (1.4)                | 4.6  | 6 (5.0)            | 6.2  | 8 (2.2)                | 2.0  | 7 (2.6)            | 2.4  | 13 (1.5)               | 0.6  |
| Bruising‡                                         | 0 (0.0)           | –    | 1 (0.5)                | 2.3  | 1 (1.0)           | 4.8  | 0 (0.0)                | –    | 0 (0.0)            | –    | 4 (1.1)                | 1.4  | 1 (0.4)            | 0.7  | 5 (0.6)                | 0.5  |
| <b>Vascular disorders</b>                         |                   |      |                        |      |                   |      |                        |      |                    |      |                        |      |                    |      |                        |      |
| Hypertension                                      | 0 (0.0)           | –    | 1 (0.5)                | 0.7  | 1 (1.0)           | 4.9  | 5 (1.7)                | 7.7  | 0 (0.0)            | –    | 13 (3.6)               | 4.4  | 1 (0.4)            | 0.7  | 19 (2.2)               | 3.7  |
| <b>Neoplasms</b>                                  |                   |      |                        |      |                   |      |                        |      |                    |      |                        |      |                    |      |                        |      |
| Neoplasms benign, malignant and unspecified (SOC) | 1 (1.9)           | 4.2  | 1 (0.5)                | 0.7  | 0 (0.0)           | –    | 0 (0.0)                | –    | 4 (3.3)            | 4.0  | 6 (1.7)                | 2.0  | 5 (1.8)            | 3.5  | 7 (0.8)                | 1.4  |

|                                                        |         |     |         |     |         |   |         |     |         |     |          |     |         |     |          |     |
|--------------------------------------------------------|---------|-----|---------|-----|---------|---|---------|-----|---------|-----|----------|-----|---------|-----|----------|-----|
| <b>Anogenital warts</b>                                | 0 (0.0) | –   | 0 (0.0) | –   | 0 (0.0) | – | 0 (0.0) | –   | 1 (0.8) | 1.0 | 2 (0.6)  | 0.7 | 1 (0.4) | 0.7 | 2 (0.2)  | 0.4 |
| <b>Fibrous histiocytoma</b>                            | 0 (0.0) | –   | 0 (0.0) | –   | 0 (0.0) | – | 0 (0.0) | –   | 1 (0.8) | 1.0 | 0 (0.0)  | –   | 1 (0.4) | 0.7 | 0 (0.0)  | –   |
| <b>Lipoma</b>                                          | 0 (0.0) | –   | 0 (0.0) | –   | 0 (0.0) | – | 0 (0.0) | –   | 1 (0.8) | 1.0 | 0 (0.0)  | –   | 1 (0.4) | 0.7 | 0 (0.0)  | –   |
| <b>Lung neoplasm</b>                                   | 1 (1.9) | 4.2 | 0 (0.0) | –   | 0 (0.0) | – | 0 (0.0) | –   | 0 (0.0) | –   | 0 (0.0)  | –   | 1 (0.4) | 0.7 | 0 (0.0)  | –   |
| <b>Oral papilloma</b>                                  | 0 (0.0) | –   | 0 (0.0) | –   | 0 (0.0) | – | 0 (0.0) | –   | 0 (0.0) | –   | 1 (0.3)  | 0.3 | 0 (0.0) | –   | 1 (0.1)  | 0.2 |
| <b>Papillary thyroid cancer</b>                        | 0 (0.0) | –   | 0 (0.0) | –   | 0 (0.0) | – | 0 (0.0) | –   | 1 (0.8) | 1.0 | 0 (0.0)  | –   | 1 (0.4) | 0.7 | 0 (0.0)  | –   |
| <b>Skin papilloma</b>                                  | 0 (0.0) | –   | 1 (0.5) | 0.7 | 0 (0.0) | – | 0 (0.0) | –   | 0 (0.0) | –   | 0 (0.0)  | –   | 0 (0.0) | –   | 1 (0.1)  | 0.2 |
| <b>Thyroid adenoma</b>                                 | 0 (0.0) | –   | 0 (0.0) | –   | 0 (0.0) | – | 0 (0.0) | –   | 0 (0.0) | –   | 1 (0.3)  | 0.3 | 0 (0.0) | –   | 1 (0.1)  | 0.2 |
| <b>Uterine leiomyoma</b>                               | 0 (0.0) | –   | 0 (0.0) | –   | 0 (0.0) | – | 0 (0.0) | –   | 0 (0.0) | –   | 2 (0.6)  | 0.7 | 0 (0.0) | –   | 2 (0.2)  | 0.4 |
| <b>Infections</b>                                      |         |     |         |     |         |   |         |     |         |     |          |     |         |     |          |     |
| <b>Serious infections and infestations</b>             | 1 (1.9) | 4.2 | 0 (0.0) | –   | 0 (0.0) | – | 2 (0.7) | 3.1 | 2 (1.7) | 2.0 | 12 (3.3) | 4.0 | 3 (1.1) | 2.1 | 14 (1.6) | 2.7 |
| <b>Herpes zoster</b>                                   | 0 (0.0) | –   | 0 (0.0) | –   | 0 (0.0) | – | 0 (0.0) | –   | 3 (2.5) | 3.0 | 9 (2.5)  | 3.0 | 3 (1.1) | 2.1 | 9 (1.0)  | 1.8 |
| <b>Immune system disorders</b>                         |         |     |         |     |         |   |         |     |         |     |          |     |         |     |          |     |
| <b>Hypersensitivity</b>                                | 0 (0.0) | –   | 1 (0.5) | 0.7 | 0 (0.0) | – | 1 (0.3) | 1.5 | 1 (0.8) | 1.0 | 1 (0.3)  | 0.3 | 1 (0.4) | 0.7 | 3 (0.3)  | 0.6 |
| <b>Musculoskeletal and connective tissue disorders</b> |         |     |         |     |         |   |         |     |         |     |          |     |         |     |          |     |

|                                       |         |      |          |     |         |     |         |     |         |     |          |     |          |     |          |     |
|---------------------------------------|---------|------|----------|-----|---------|-----|---------|-----|---------|-----|----------|-----|----------|-----|----------|-----|
| <b>Osteonecrosis</b>                  | 0 (0.0) | –    | 0 (0.0)  | –   | 0 (0.0) | –   | 0 (0.0) | –   | 1 (0.8) | 1.0 | 3 (0.8)  | 1.0 | 1 (0.4)  | 0.7 | 3 (0.3)  | 0.6 |
| <b>Liver-related TEAEs</b>            |         |      |          |     |         |     |         |     |         |     |          |     |          |     |          |     |
| <b>ALT increase*</b>                  | 2 (3.7) | 8.4  | 10 (4.8) | 6.6 | 1 (1.0) | 4.8 | 3 (1.0) | 4.6 | 1 (0.8) | 1.0 | 12 (3.3) | 4.0 | 4 (1.5)  | 2.8 | 25 (2.9) | 4.8 |
| <b>AST increase*</b>                  | 0 (0.0) | –    | 7 (3.4)  | 4.6 | 0 (0.0) | –   | 3 (1.0) | 4.6 | 1 (0.8) | 1.0 | 8 (2.2)  | 2.7 | 1 (0.4)  | 0.7 | 18 (2.1) | 3.5 |
| <b>Pancreas-related TEAEs</b>         |         |      |          |     |         |     |         |     |         |     |          |     |          |     |          |     |
| <b>Amylase increase</b>               | 4 (7.4) | 17.0 | 8 (3.8)  | 5.3 | 1 (1.0) | 4.9 | 3 (1.0) | 4.6 | 5 (4.2) | 5.1 | 15 (4.2) | 5.1 | 10 (3.7) | 7.0 | 26 (3.0) | 5.1 |
| <b>Lipase increase*</b>               | 1 (1.9) | 4.2  | 6 (2.9)  | 4.0 | 1 (1.0) | 4.9 | 1 (0.3) | 1.5 | 2 (1.7) | 2.0 | 10 (2.8) | 3.4 | 4 (1.5)  | 2.8 | 17 (2.0) | 4.0 |
| <b>Leucopenia-related TEAEs</b>       |         |      |          |     |         |     |         |     |         |     |          |     |          |     |          |     |
| <b>Lymphopenia*</b>                   | 0 (0.0) | –    | 2 (1.0)  | 1.3 | 1 (1.0) | 4.9 | 1 (0.3) | 1.5 | 9 (7.5) | 9.6 | 13 (3.6) | 4.5 | 10 (3.7) | 7.2 | 16 (1.9) | 3.1 |
| <b>Neutropenia*</b>                   | 0 (0.0) | –    | 1 (0.5)  | 0.7 | 1 (1.0) | 4.8 | 0 (0.0) | –   | 5 (4.2) | 5.1 | 9 (2.5)  | 3.0 | 6 (2.2)  | 4.2 | 10 (1.2) | 1.9 |
| <b>Thrombocytopenia-related TEAEs</b> |         |      |          |     |         |     |         |     |         |     |          |     |          |     |          |     |
| <b>Thrombocytopenia*</b>              | 0 (0.0) | –    | 0 (0.0)  | –   | 0 (0.0) | –   | 0 (0.0) | –   | 0 (0.0) | –   | 2 (0.6)  | 0.7 | 0 (0.0)  | –   | 2 (0.2)  | 0.4 |

\*The event with the highest severity for a patient during the treatment period and meeting the AESI definition was included in the summary.

†Defined by medical concept as epistaxis, hematoma, hematoma muscle, hemorrhagic diathesis.

‡Defined by medical concept as ecchymosis and petechiae.

**AESI**, adverse event of special interest; **EAIR**, exposure-adjusted incidence rates; **MS**, multiple sclerosis; **RA**, rheumatoid arthritis; **SLE**, systemic lupus erythematosus; **SOC**, system organ class; **TEAEs**, treatment-emergent adverse events.
